# Supplementary material for: High prevalence and clustering of modifiable CVD risk factors among rural adolescents in southwest Nigeria: implication for grass root prevention
Source: Springer Nature journal article supplement (doi:10.1186/s12889-015-2028-3), 2015-07-13
Supplement: MOESM1 [file 9749878]

# **NIGERIA COMPOSITE LIFESTYLE CVD RISK FACTORS QUESTIONNAIRE FOR ADOLESCENTS**

Thank you for agreeing to complete this questionnaire which is about health behaviours that can cause heart disease. We have developed it to get information from you about things you do that may affect your heart health.

The information we are getting from you will be used to develop programs that will help young people like you. There are no wrong and right answers, so answer the questions based on what you know.

The answers you give will be kept secret and will only be used for research purpose.

Kindly read every question thoroughly and tick the right box. Use a pencil so you can erase any answer you tick by mistake.

## **INSTRUCTIONS FOR COMPLETING QUESTIONNAIRE**

- ◆ **Use HB pencil only**
- ◆ **Tick your answer in the appropriate box.**
- ◆ **Where required, complete on dotted line provided.**
- ◆ **If you change your answer, erase your old answer completely.**
- ◆ **Each section deals with a different aspects such as personal details, etc.,**

**SECTION 1**  
**Personal information**

1. Gender:  Male  Female
2. Date of Birth: .....(yyyy)/.....(mm)/.....(dd)
3. How old are you ?
- 12 years old or younger
  - 13 years old
  - 14 years old
  - 15 years old
  - 16 years old
  - 17 years old
  - 18 years old or older
4. In what class are you?
- JSS3 grade
  - SSS1 grade
  - SSS2 grade
  - SSS3 grade
  - Other grades

**SECTION 2**  
**CVD indicators and family history of CVD**

5. Do you get tired easily even when you don't do exercise? Yes  No
6. Do you have chest pain when you do exercises such as running, playing football, pounding? Yes  No
7. Do you find it difficult to breathe after a little exercise such as climbing stairs, walking about for 10 minutes? Yes  No
8. Do either of your parents or close relation have heart disease? Yes  No
9. Do any of your parents or close relation receive treatment from a doctor for heart disease, hypertension or diabetes? Yes  No

**SECTION 3**  
**Tobacco usage**

10. Answer NO if you have never smoked and do not intent to smoke in future (else answer YES) Yes  No
11. You have tried cigarette smoking, even one or two puffs Yes  No
12. How old were you when you smoked a whole cigarette for the first time?  
 I have never smoked a whole cigarette  
 8 years old or younger  
 9 or 10 years old  
 11 or 12 years old  
 13 or 14 years old  
 15 or 16 years old  
 17 years old  
 18 years old or older
13. You have tried smoking, but not smoked in the past 30 days Yes  No
14. Do you intend smoking in the future? Yes  No
15. During the past 30 days, on how many days did you smoke cigarettes?  
 0 days  
 1 or 2 days  
 3 to 5 days  
 6 to 9 days  
 10 to 19 days  
 20 to 29 days  
 All 30 days
16. During the past 30 days, on the days you smoked, how many cigarettes did you smoke per day?  
 I did not smoke cigarettes during the past 30 days  
 Less than 1 cigarette per day  
 1 cigarette per day  
 2 to 5 cigarettes per day  
 6 to 10 cigarettes per day  
 11 to 20 cigarettes per day  
 More than 20 cigarettes per day
17. You have smoked cigarettes daily, that is, at least one cigarette every day for 30 days? Yes  No

18. During the past 30 days, on how many days did you use **chewing tobacco, snuff or smoke raw tobacco**?

- 0 days
- 1 or 2 days
- 3 to 5 days
- 6 to 9 days
- 10 to 19 days
- 20 to 29 days
- All 30 days

## SECTION 4 Alcohol usage

*The next 4 questions ask about drinking alcohol. This includes drinking beer, wine, and hot drink such as ogoro. For these questions, drinking alcohol does NOT include drinking a few sips of wine for religious purposes.*

19. How often do you have a drink containing alcohol?

- Never
- Monthly
- 2 - 4 times a month
- 2 - 3 times a week
- 4 or more times a week

20. How old were you when you had your first drink of alcohol (more than a few sips)?

- I have never had a drink of alcohol other than a few sips
- 8 years old or younger
- 9 or 10 years old
- 11 or 12 years old
- 13 or 14 years old
- 15 or 16 years old
- 17 years old or older

21. How many standard drinks of alcohol ( 1 standard drink is about 350 ml or equivalent of one bottle of small coke) do you have on a typical day when drinking?

- 1 or 2
- 3 or 4
- 5 or 6
- 7 to 9
- 10 or more

22. How often do you have six or more drinks on one occasion?

- Never
- Less than monthly
- Monthly
- Weekly
- Daily or almost daily

## SECTION 5

### Physical activity

**23.** During the past 7 days, on how many days were you physically active for a total of **at least 60 minutes per day**? (Add up all the time you spend in any kind of physical activity that increases your heart rate and makes you breathe hard some of the time.)

- 0 days
- 1 day
- 2 days
- 3 days
- 4 days
- 5 days
- 6 days
- 7 days

**24.** Which of the following activities have you done during the past seven days?

|                       | 0                        | 1-2                      | 3-4                      | 5-6                      | 7 or more                |
|-----------------------|--------------------------|--------------------------|--------------------------|--------------------------|--------------------------|
| Skipping              | <input type="checkbox"/> | <input type="checkbox"/> | <input type="checkbox"/> | <input type="checkbox"/> | <input type="checkbox"/> |
| Rowing, canoeing      | <input type="checkbox"/> | <input type="checkbox"/> | <input type="checkbox"/> | <input type="checkbox"/> | <input type="checkbox"/> |
| Brisk walk            | <input type="checkbox"/> | <input type="checkbox"/> | <input type="checkbox"/> | <input type="checkbox"/> | <input type="checkbox"/> |
| Bicycling             | <input type="checkbox"/> | <input type="checkbox"/> | <input type="checkbox"/> | <input type="checkbox"/> | <input type="checkbox"/> |
| Jogging or running    | <input type="checkbox"/> | <input type="checkbox"/> | <input type="checkbox"/> | <input type="checkbox"/> | <input type="checkbox"/> |
| Aerobics              | <input type="checkbox"/> | <input type="checkbox"/> | <input type="checkbox"/> | <input type="checkbox"/> | <input type="checkbox"/> |
| Swimming              | <input type="checkbox"/> | <input type="checkbox"/> | <input type="checkbox"/> | <input type="checkbox"/> | <input type="checkbox"/> |
| Baseball or soft ball | <input type="checkbox"/> | <input type="checkbox"/> | <input type="checkbox"/> | <input type="checkbox"/> | <input type="checkbox"/> |
| Football              | <input type="checkbox"/> | <input type="checkbox"/> | <input type="checkbox"/> | <input type="checkbox"/> | <input type="checkbox"/> |
| Dance                 | <input type="checkbox"/> | <input type="checkbox"/> | <input type="checkbox"/> | <input type="checkbox"/> | <input type="checkbox"/> |
| Badminton             | <input type="checkbox"/> | <input type="checkbox"/> | <input type="checkbox"/> | <input type="checkbox"/> | <input type="checkbox"/> |
| Volley ball           | <input type="checkbox"/> | <input type="checkbox"/> | <input type="checkbox"/> | <input type="checkbox"/> | <input type="checkbox"/> |
| Table tennis          | <input type="checkbox"/> | <input type="checkbox"/> | <input type="checkbox"/> | <input type="checkbox"/> | <input type="checkbox"/> |
| Lawn tennis           | <input type="checkbox"/> | <input type="checkbox"/> | <input type="checkbox"/> | <input type="checkbox"/> | <input type="checkbox"/> |
| Basket ball           | <input type="checkbox"/> | <input type="checkbox"/> | <input type="checkbox"/> | <input type="checkbox"/> | <input type="checkbox"/> |
| Soccer                | <input type="checkbox"/> | <input type="checkbox"/> | <input type="checkbox"/> | <input type="checkbox"/> | <input type="checkbox"/> |
| Cricket               | <input type="checkbox"/> | <input type="checkbox"/> | <input type="checkbox"/> | <input type="checkbox"/> | <input type="checkbox"/> |
| Gardening /farming    | <input type="checkbox"/> | <input type="checkbox"/> | <input type="checkbox"/> | <input type="checkbox"/> | <input type="checkbox"/> |
| Others                | <input type="checkbox"/> | <input type="checkbox"/> | <input type="checkbox"/> | <input type="checkbox"/> | <input type="checkbox"/> |

**25.** On an average school day, how many hours do you watch TV?

- I do not watch TV on an average school day
- Less than 1 hour per day
- 1 hour per day
- 2 hours per day
- 3 hours per day
- 4 hours per day
- 5 or more hours per day

**26.** On an average school day, how many hours do you play video or computer games or use a computer or handset for something that is not school work? (including activities such as computer games, and the Internet.)

- I do not play video or computer games or use a computer for something that is not school work
- Less than 1 hour per day
- 1 hour per day
- 2 hours per day
- 3 hours per day
- 4 hours per day
- 5 or more hours per day

**27.** Do you have Physical education (PE) practical in your school time table? Yes  No

**28.** In an average week when you are in school, on how many days do you go to Physical Education (PE) practical classes?

- 0 days
- 1 day
- 2 days
- 3 days
- 4 days
- 5 days

**29.** During the past 12 months, on how many sporting competition/inter house sport did you take part? (Example; football, sprint, relay)

- 0 teams
- 1 team
- 2 teams
- 3 or more teams

**SECTION 6**  
**Nutritional information**

30. How many times a week do you eat each food on this list below?

|                                                               | Days per Week |   |   |   |   |   |   |
|---------------------------------------------------------------|---------------|---|---|---|---|---|---|
|                                                               | 1             | 2 | 3 | 4 | 5 | 6 | 7 |
| <b>MEAT</b>                                                   |               |   |   |   |   |   |   |
| Pork                                                          |               |   |   |   |   |   |   |
| Turkey                                                        |               |   |   |   |   |   |   |
| Liver                                                         |               |   |   |   |   |   |   |
| Kidney                                                        |               |   |   |   |   |   |   |
| Other organ meat (intestine, etc)                             |               |   |   |   |   |   |   |
| Meat pies/pastries                                            |               |   |   |   |   |   |   |
| Ready meals                                                   |               |   |   |   |   |   |   |
| Beef (cow meat)                                               |               |   |   |   |   |   |   |
| Goat                                                          |               |   |   |   |   |   |   |
| Chicken                                                       |               |   |   |   |   |   |   |
| <b>BREAKFAST CEREALS</b>                                      |               |   |   |   |   |   |   |
| Pap (from millet, guinea corn etc)                            |               |   |   |   |   |   |   |
| Golden morn                                                   |               |   |   |   |   |   |   |
| Corn flakes                                                   |               |   |   |   |   |   |   |
| Any other brands                                              |               |   |   |   |   |   |   |
| <b>VEGETABLES</b>                                             |               |   |   |   |   |   |   |
| Salad vegetables                                              |               |   |   |   |   |   |   |
| Leafy green vegetables<br>(E.g. green, ugu, waterleaf, ewedu) |               |   |   |   |   |   |   |
| Green peas                                                    |               |   |   |   |   |   |   |
| Carrot                                                        |               |   |   |   |   |   |   |
| Pepper                                                        |               |   |   |   |   |   |   |
| Baked beans                                                   |               |   |   |   |   |   |   |
| Beans                                                         |               |   |   |   |   |   |   |
| Soya beans                                                    |               |   |   |   |   |   |   |
| Other                                                         |               |   |   |   |   |   |   |
| <b>FRUITS</b>                                                 |               |   |   |   |   |   |   |
| Garden eggs                                                   |               |   |   |   |   |   |   |
| Oranges                                                       |               |   |   |   |   |   |   |
| Bananas                                                       |               |   |   |   |   |   |   |
| Grape fruits                                                  |               |   |   |   |   |   |   |
| Pawpaw                                                        |               |   |   |   |   |   |   |
| Mangoes                                                       |               |   |   |   |   |   |   |
| Cashew                                                        |               |   |   |   |   |   |   |
| Apples                                                        |               |   |   |   |   |   |   |
| Other                                                         |               |   |   |   |   |   |   |
| <b>Other FOOD</b>                                             |               |   |   |   |   |   |   |
| Cassava and cassava products                                  |               |   |   |   |   |   |   |
| Yam and yam product                                           |               |   |   |   |   |   |   |
| Plantain                                                      |               |   |   |   |   |   |   |
| Bread                                                         |               |   |   |   |   |   |   |
| Eggs                                                          |               |   |   |   |   |   |   |
| Fish                                                          |               |   |   |   |   |   |   |
| Ice cream                                                     |               |   |   |   |   |   |   |
| Rice                                                          |               |   |   |   |   |   |   |
| Pasta/Noodles/Spaghetti                                       |               |   |   |   |   |   |   |

31. Do you add salt to food at table if salt was already added to food during the cooking process? Yes  No

32. How much salt do you eat compared to other young people like you?

More salt

Less salt

Same amount of salt

33. How do you prefer your food cooked? (E.g meat, fish, egg, plantain)

Boiled

Fried

Roasted

**This is the end of the survey.**

**Thank you !!**
